# Supplementary material for: Inhibition of cell surface GRP78 and activated α2M interaction attenuates kidney fibrosis
Source: JCI journal article supplement (doi:10.1172/jci.insight.183998), 2025-12-21

Figure 1

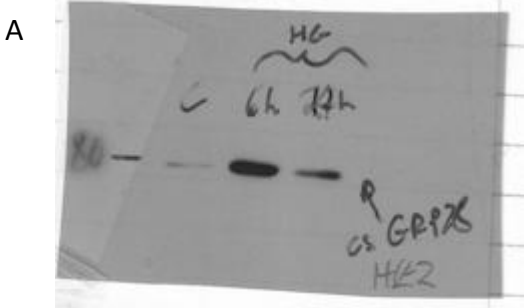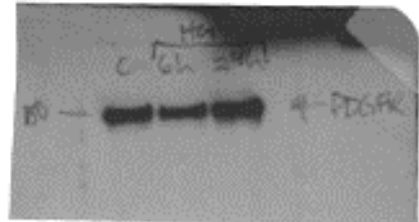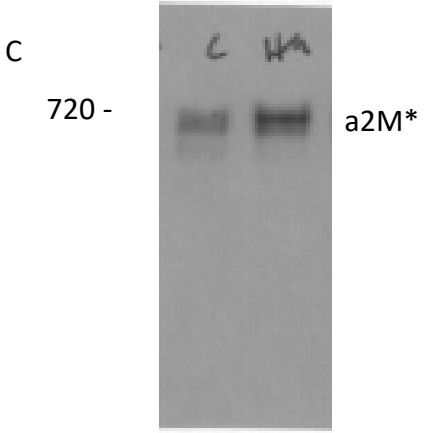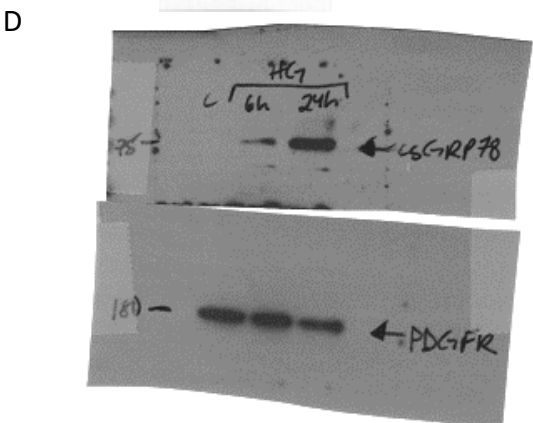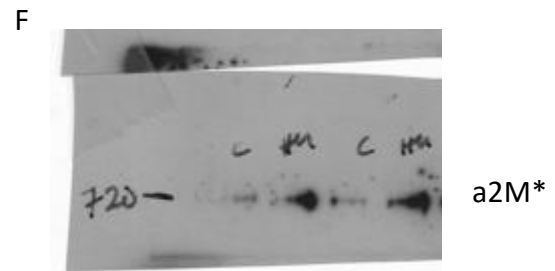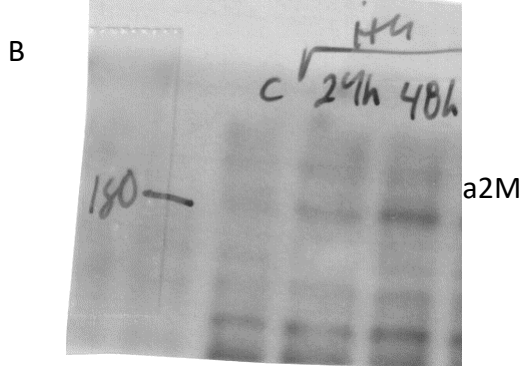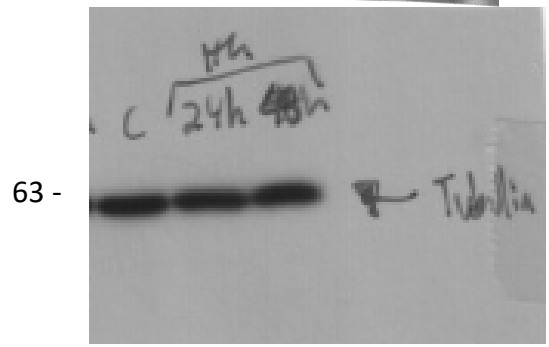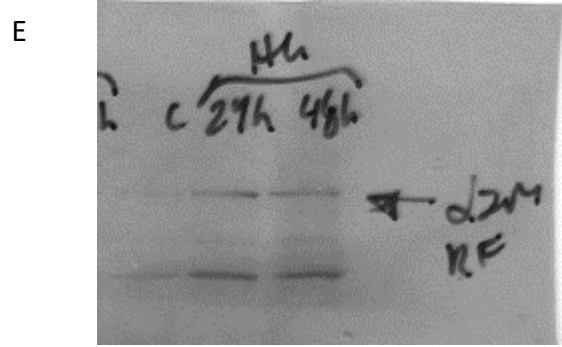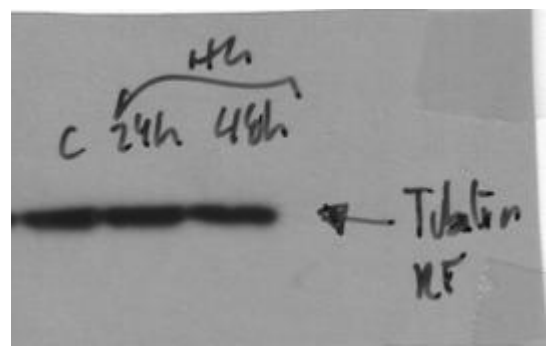

Figure 1

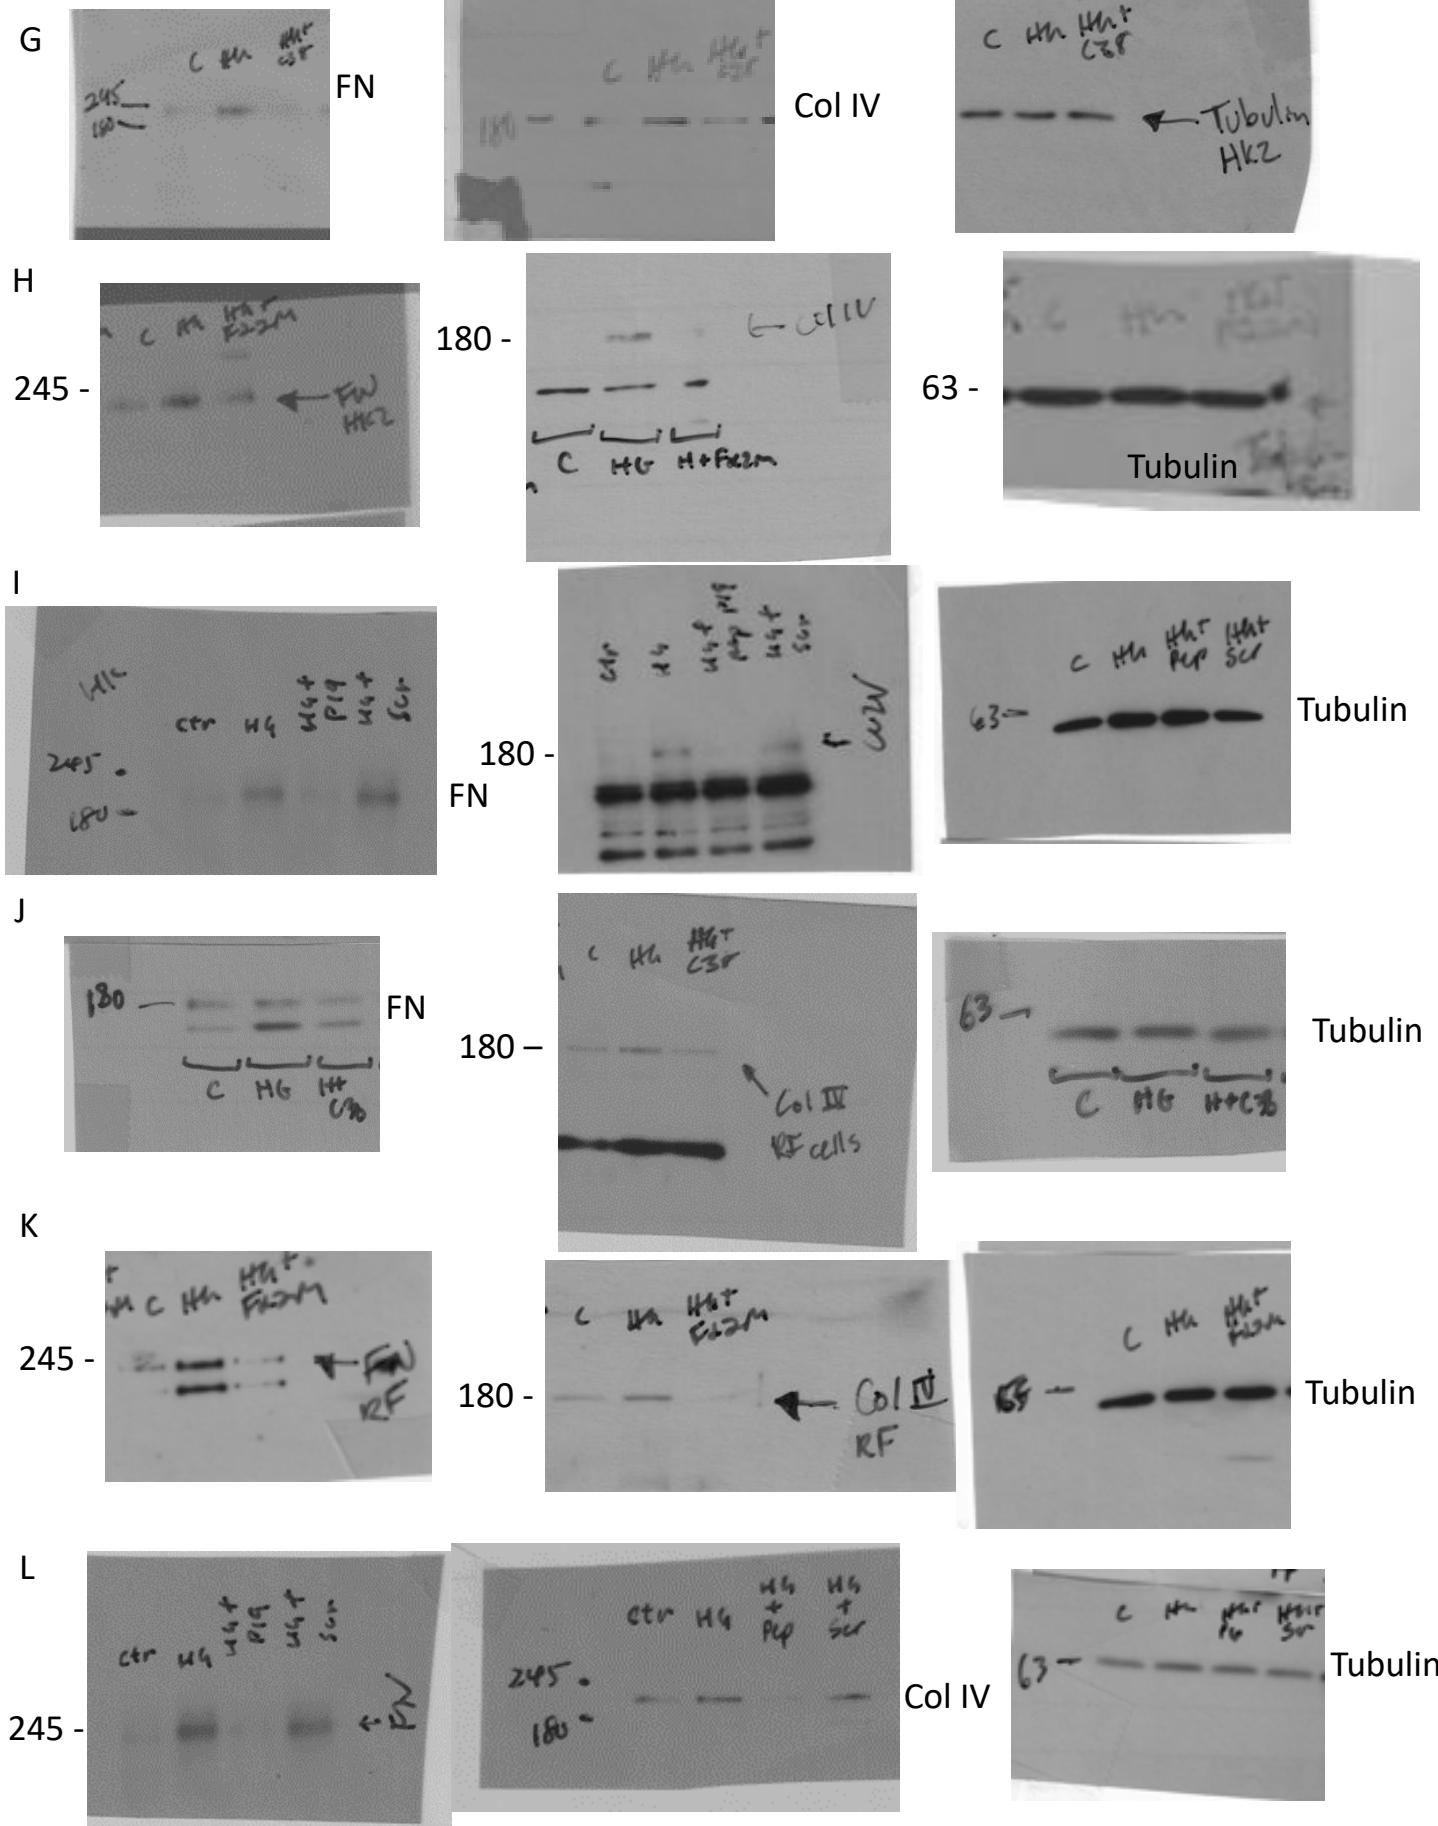

Figure 2

A

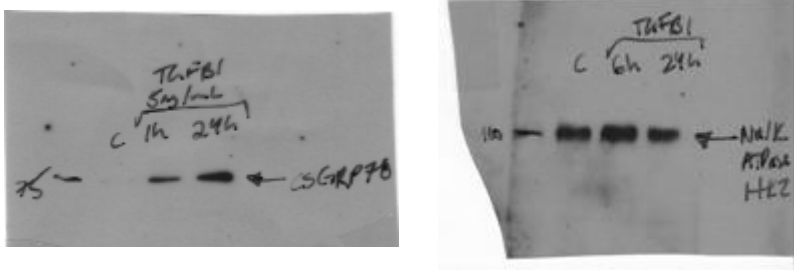

B

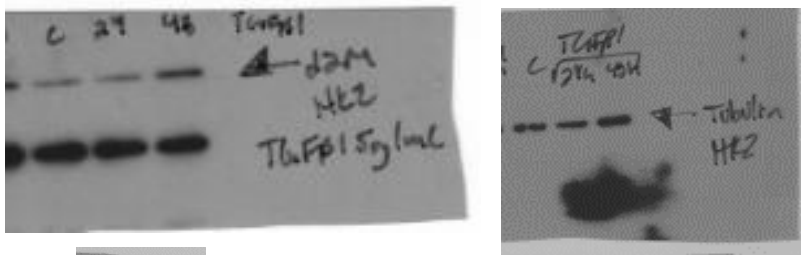

C

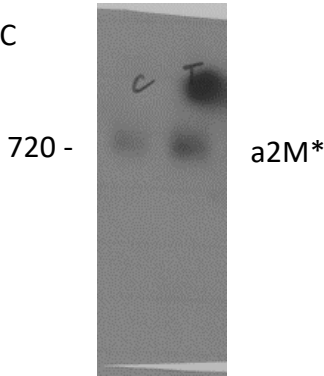

D

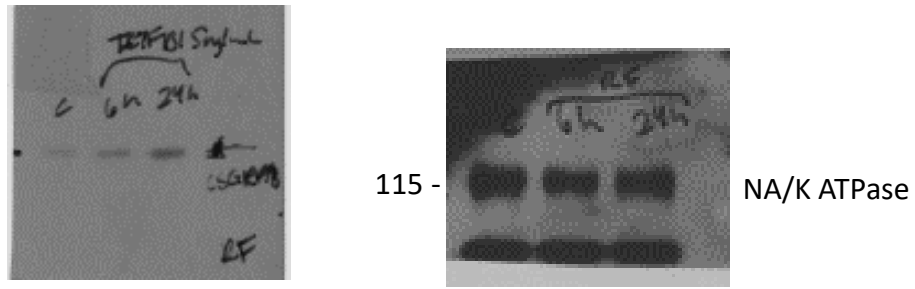

E

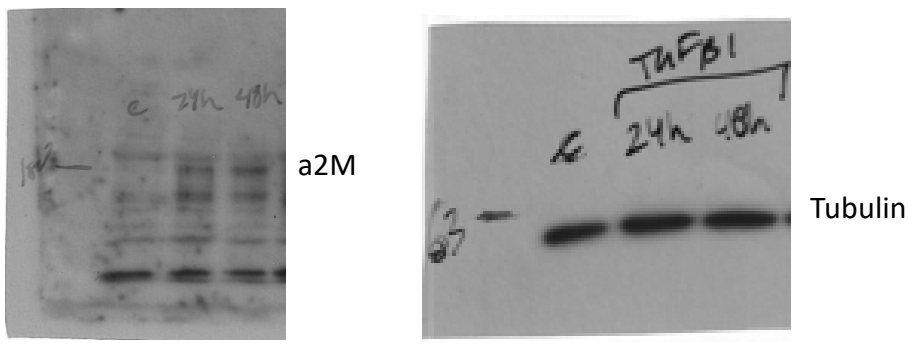

F

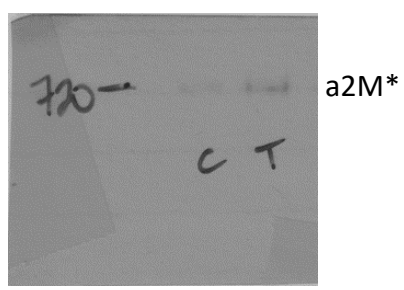

Figure 2

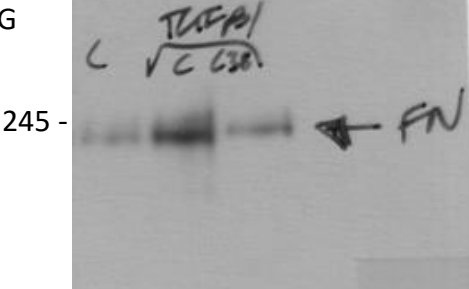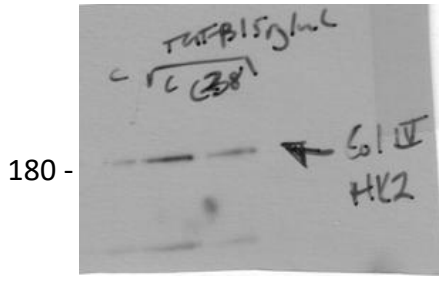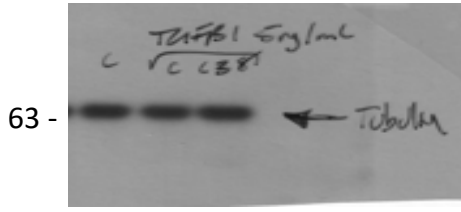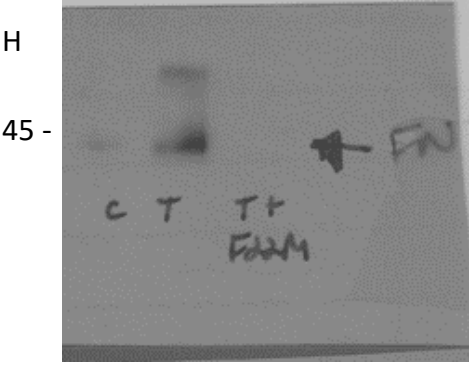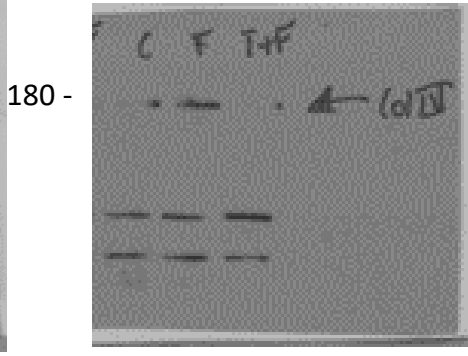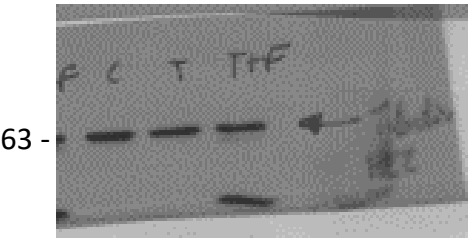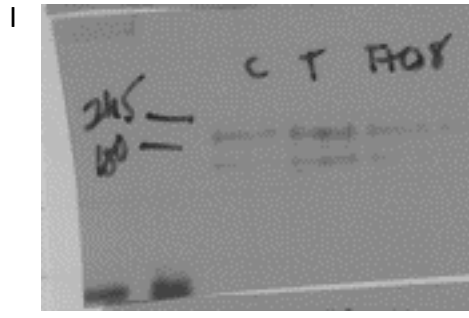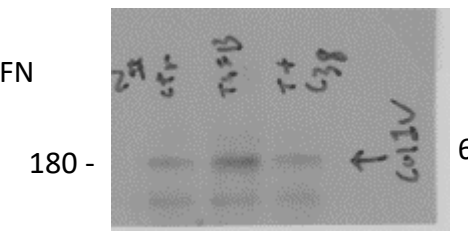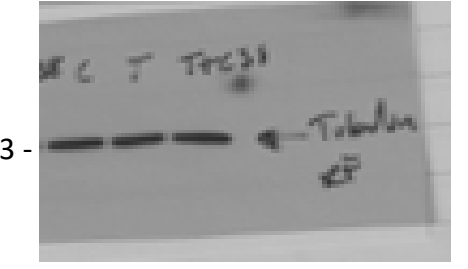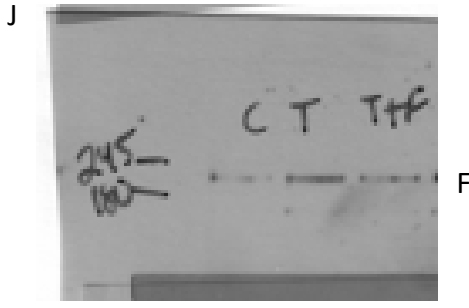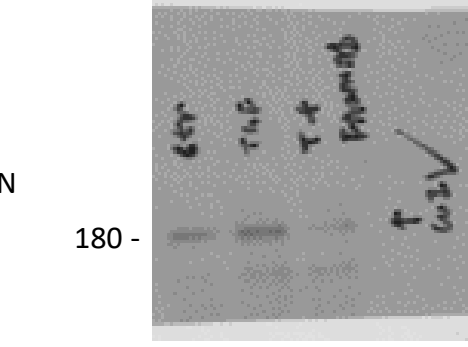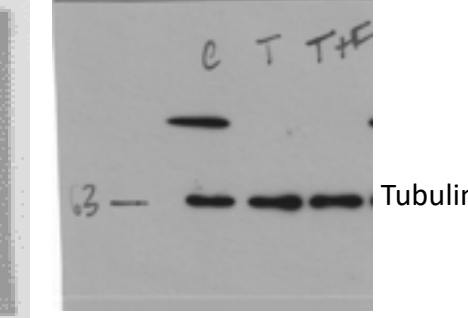

Figure 3

A

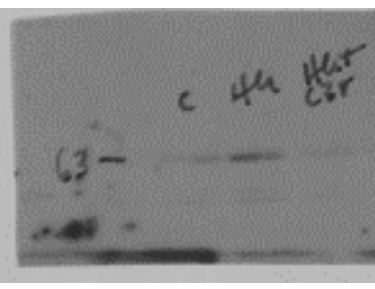

pSmad3

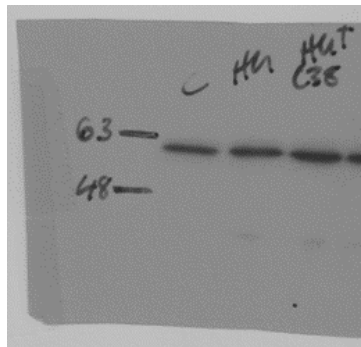

Total Smad3

B

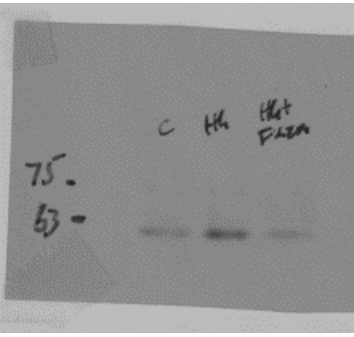

pSmad3

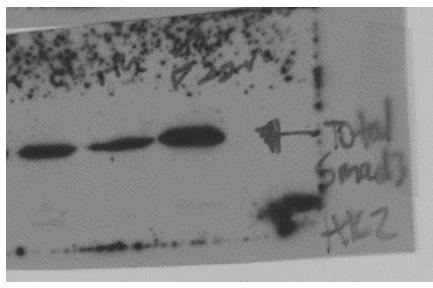

C

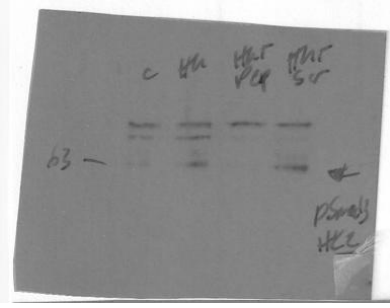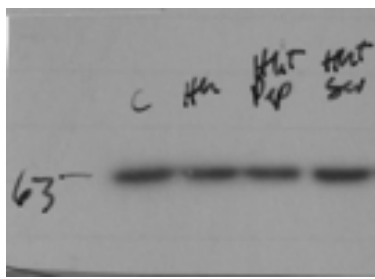

Total Smad3

D

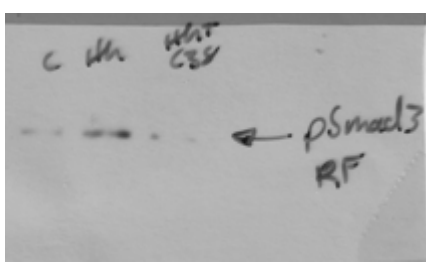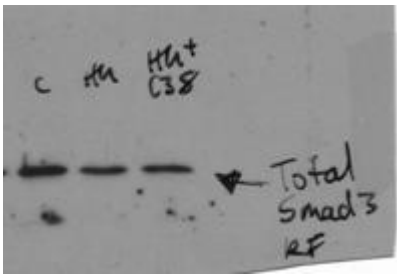

E

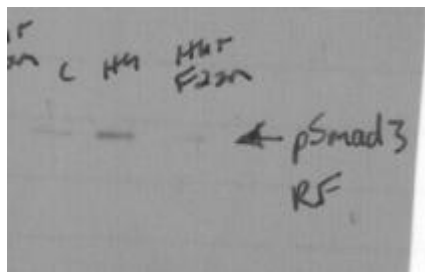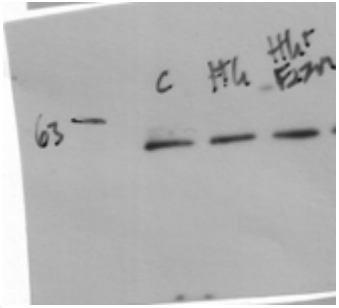

Total Smad3

F

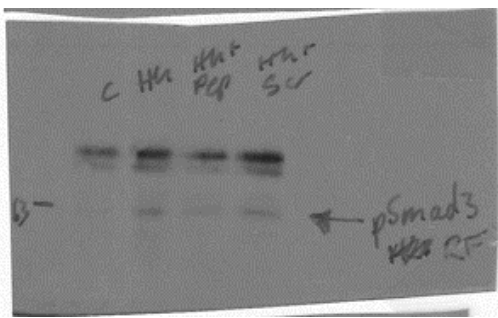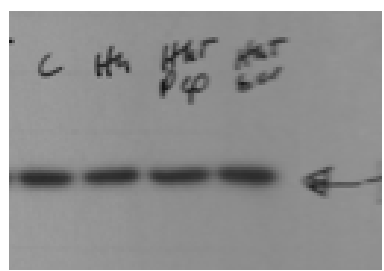

Total Smad3

Figure 3

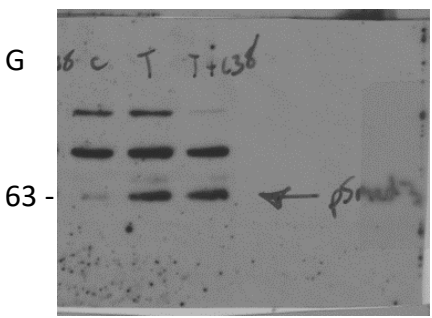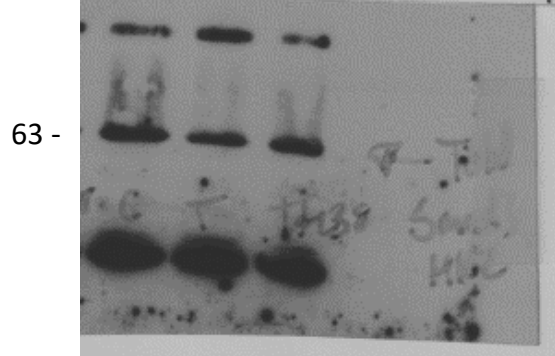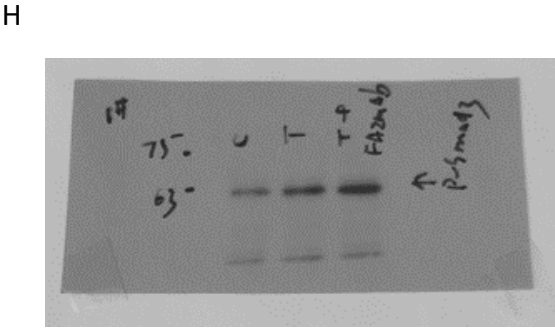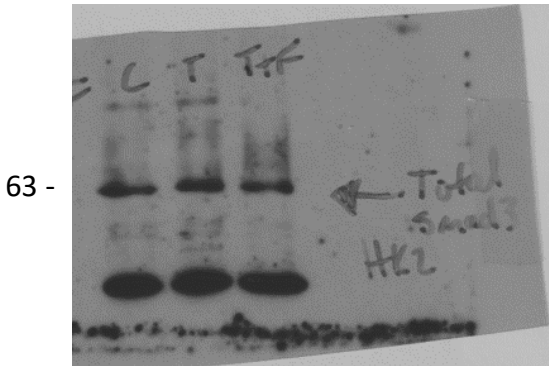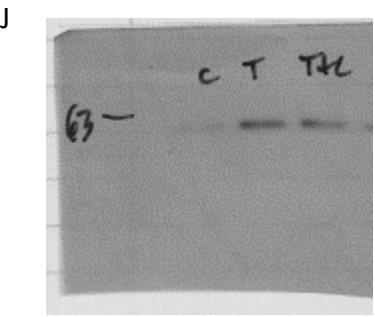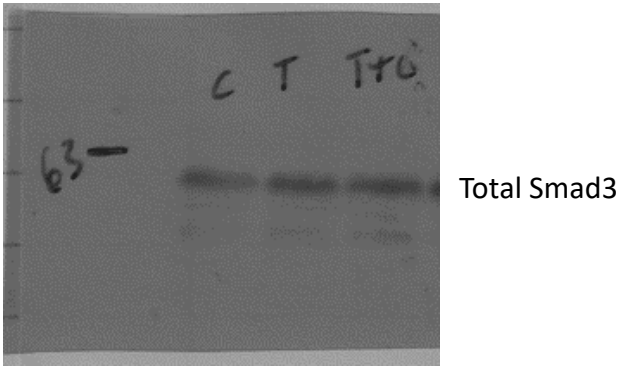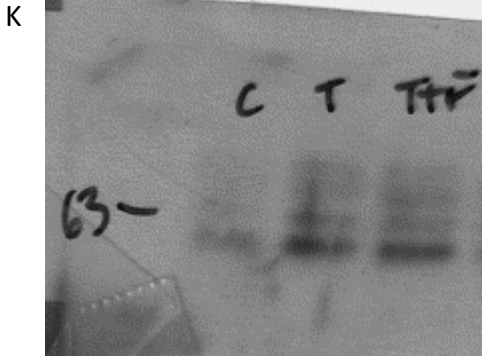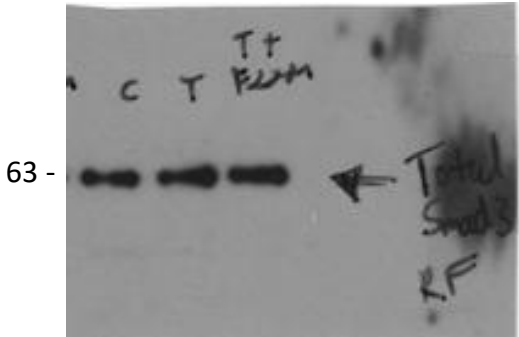

Figure 4

A

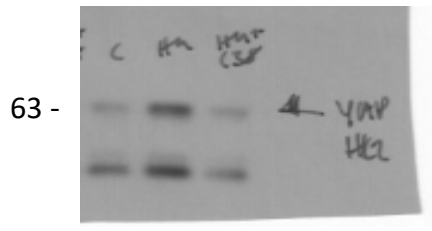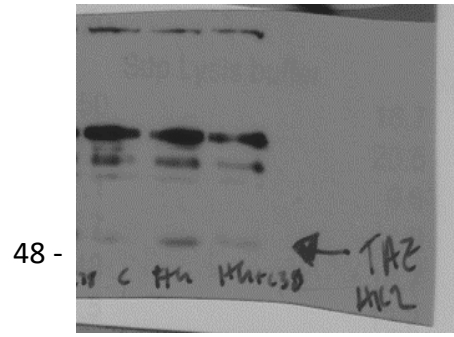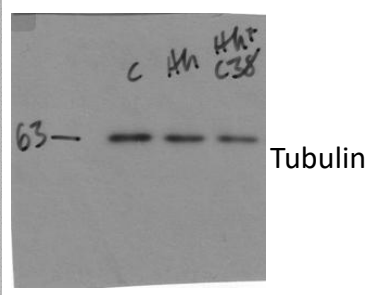

B

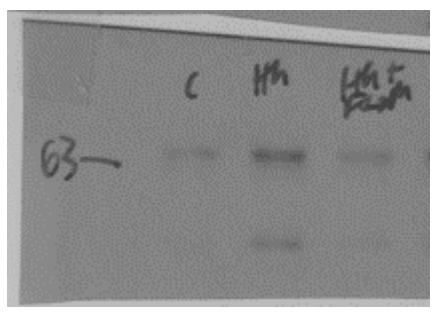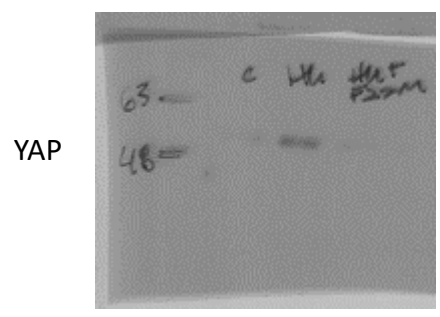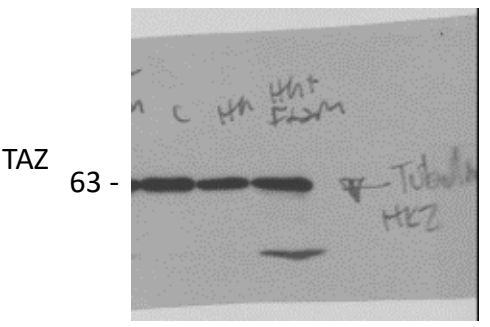

C

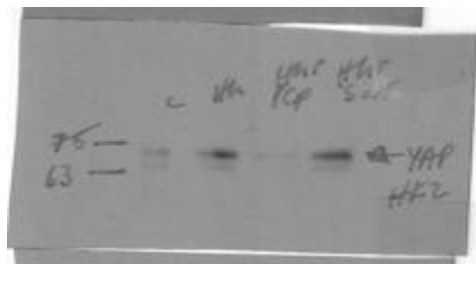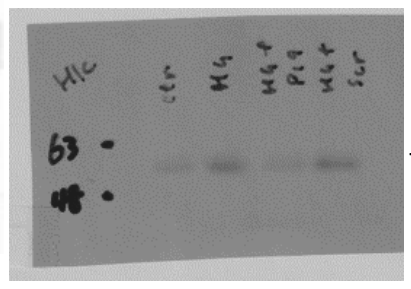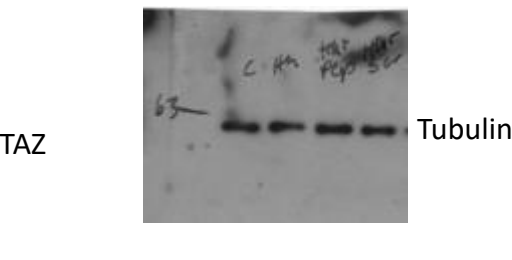

D

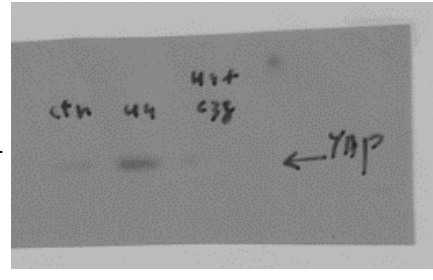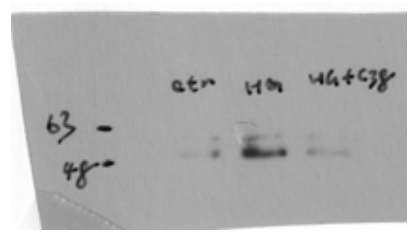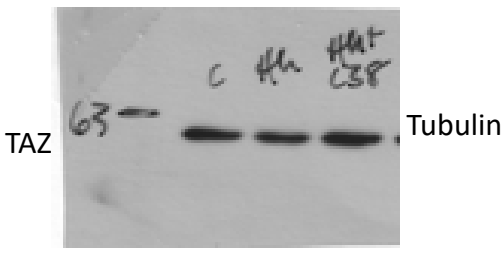

E

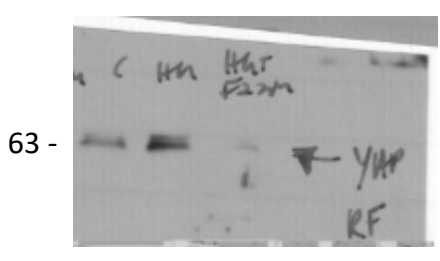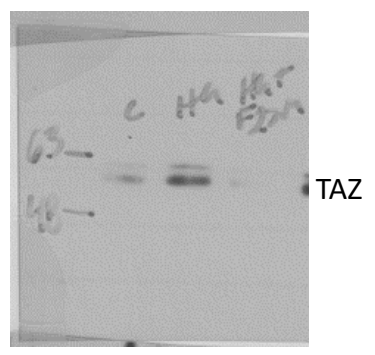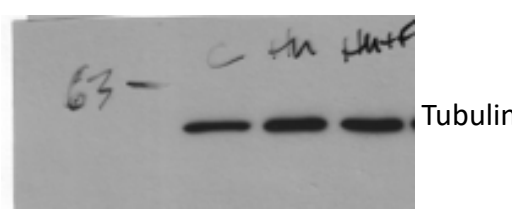

F

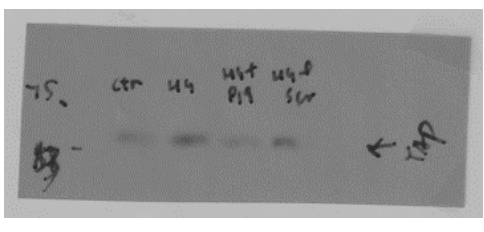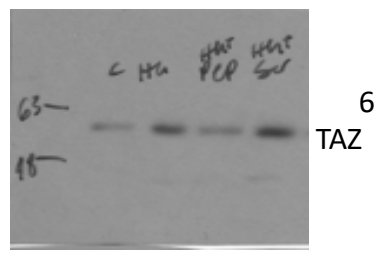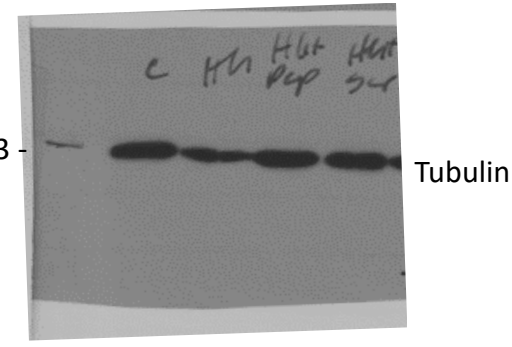

Figure 4

G

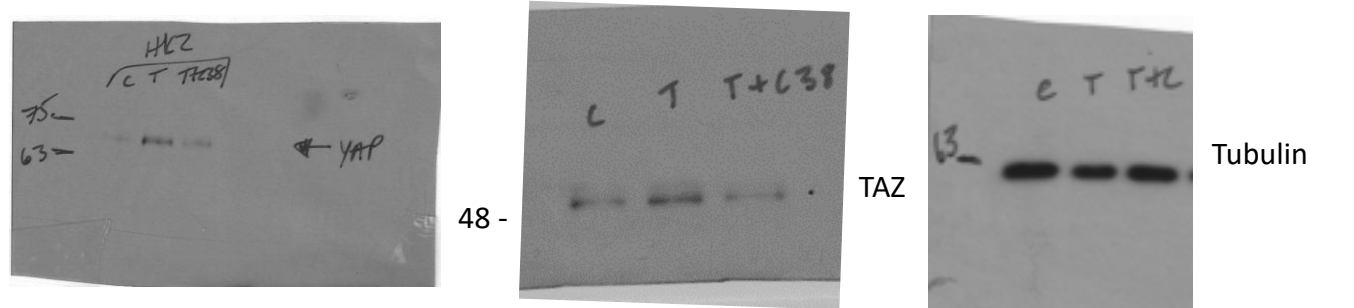

H

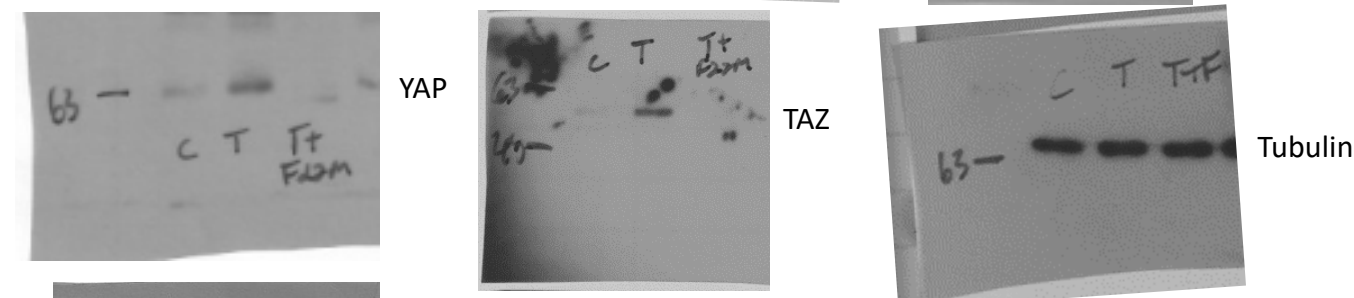

J

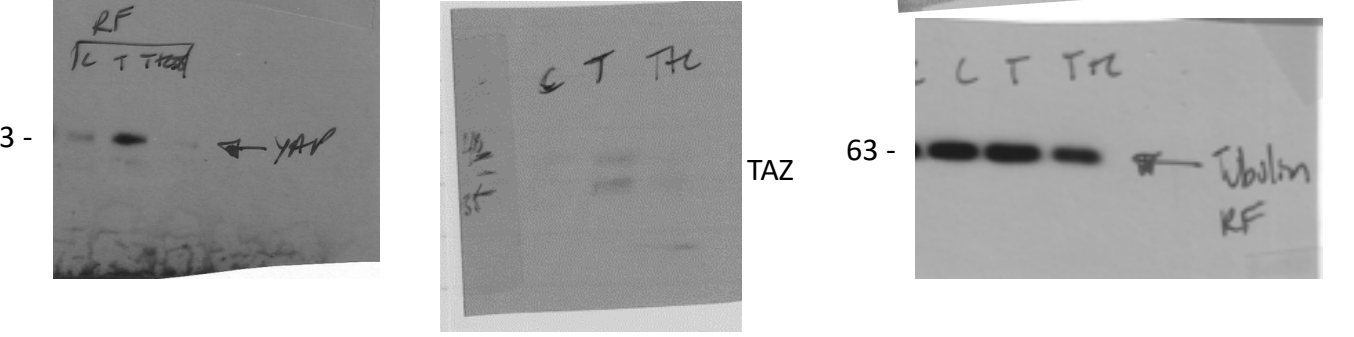

K

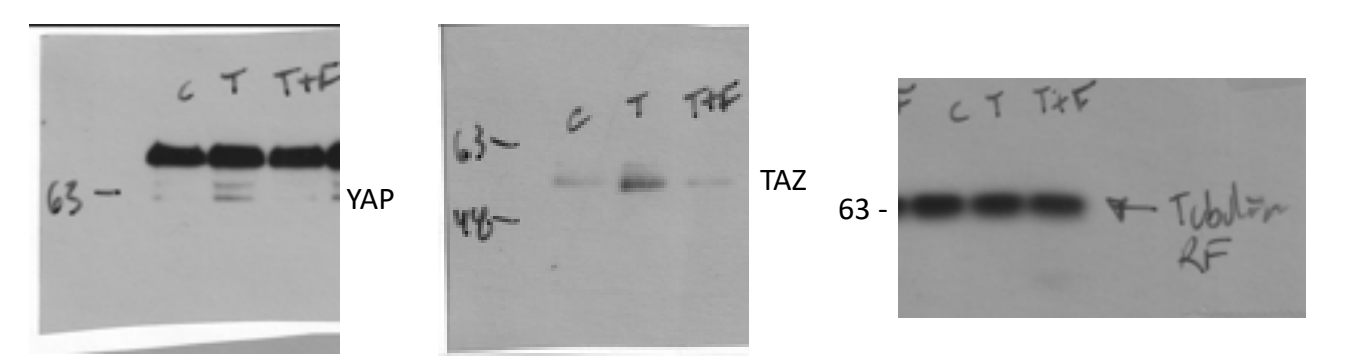

Figure 5

A

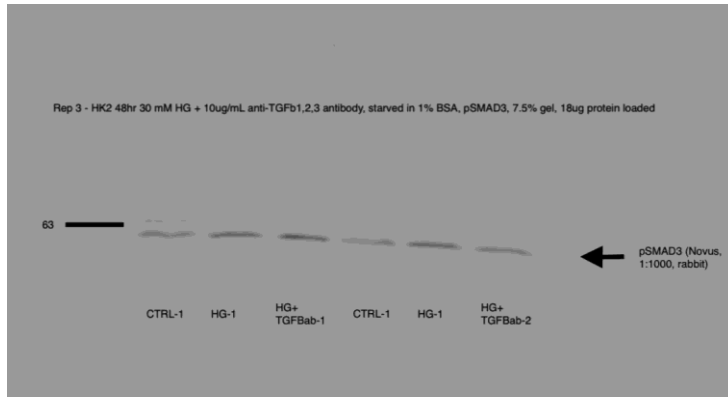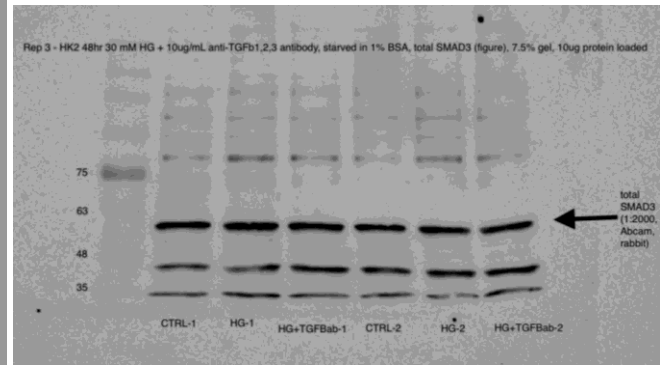

B

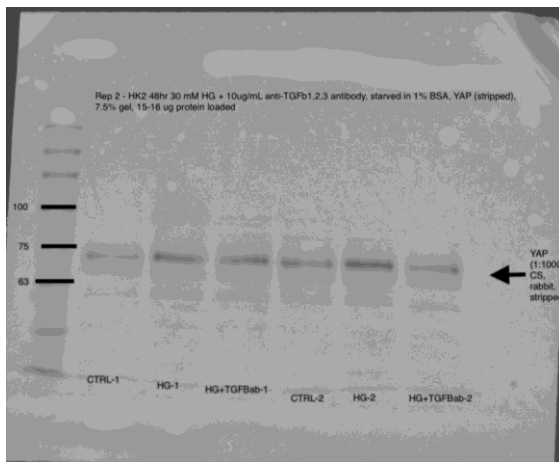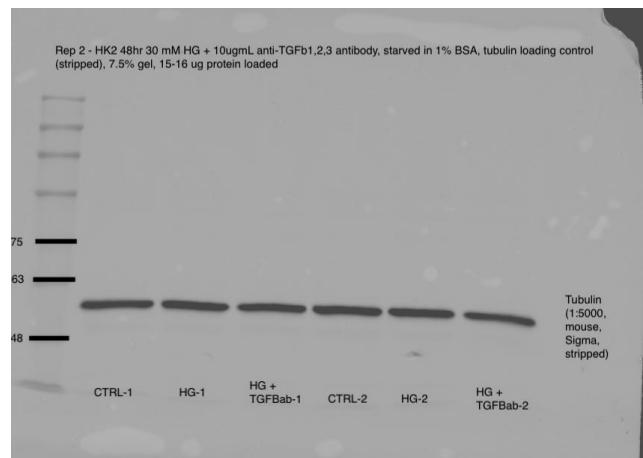

Supplementary Figure 1

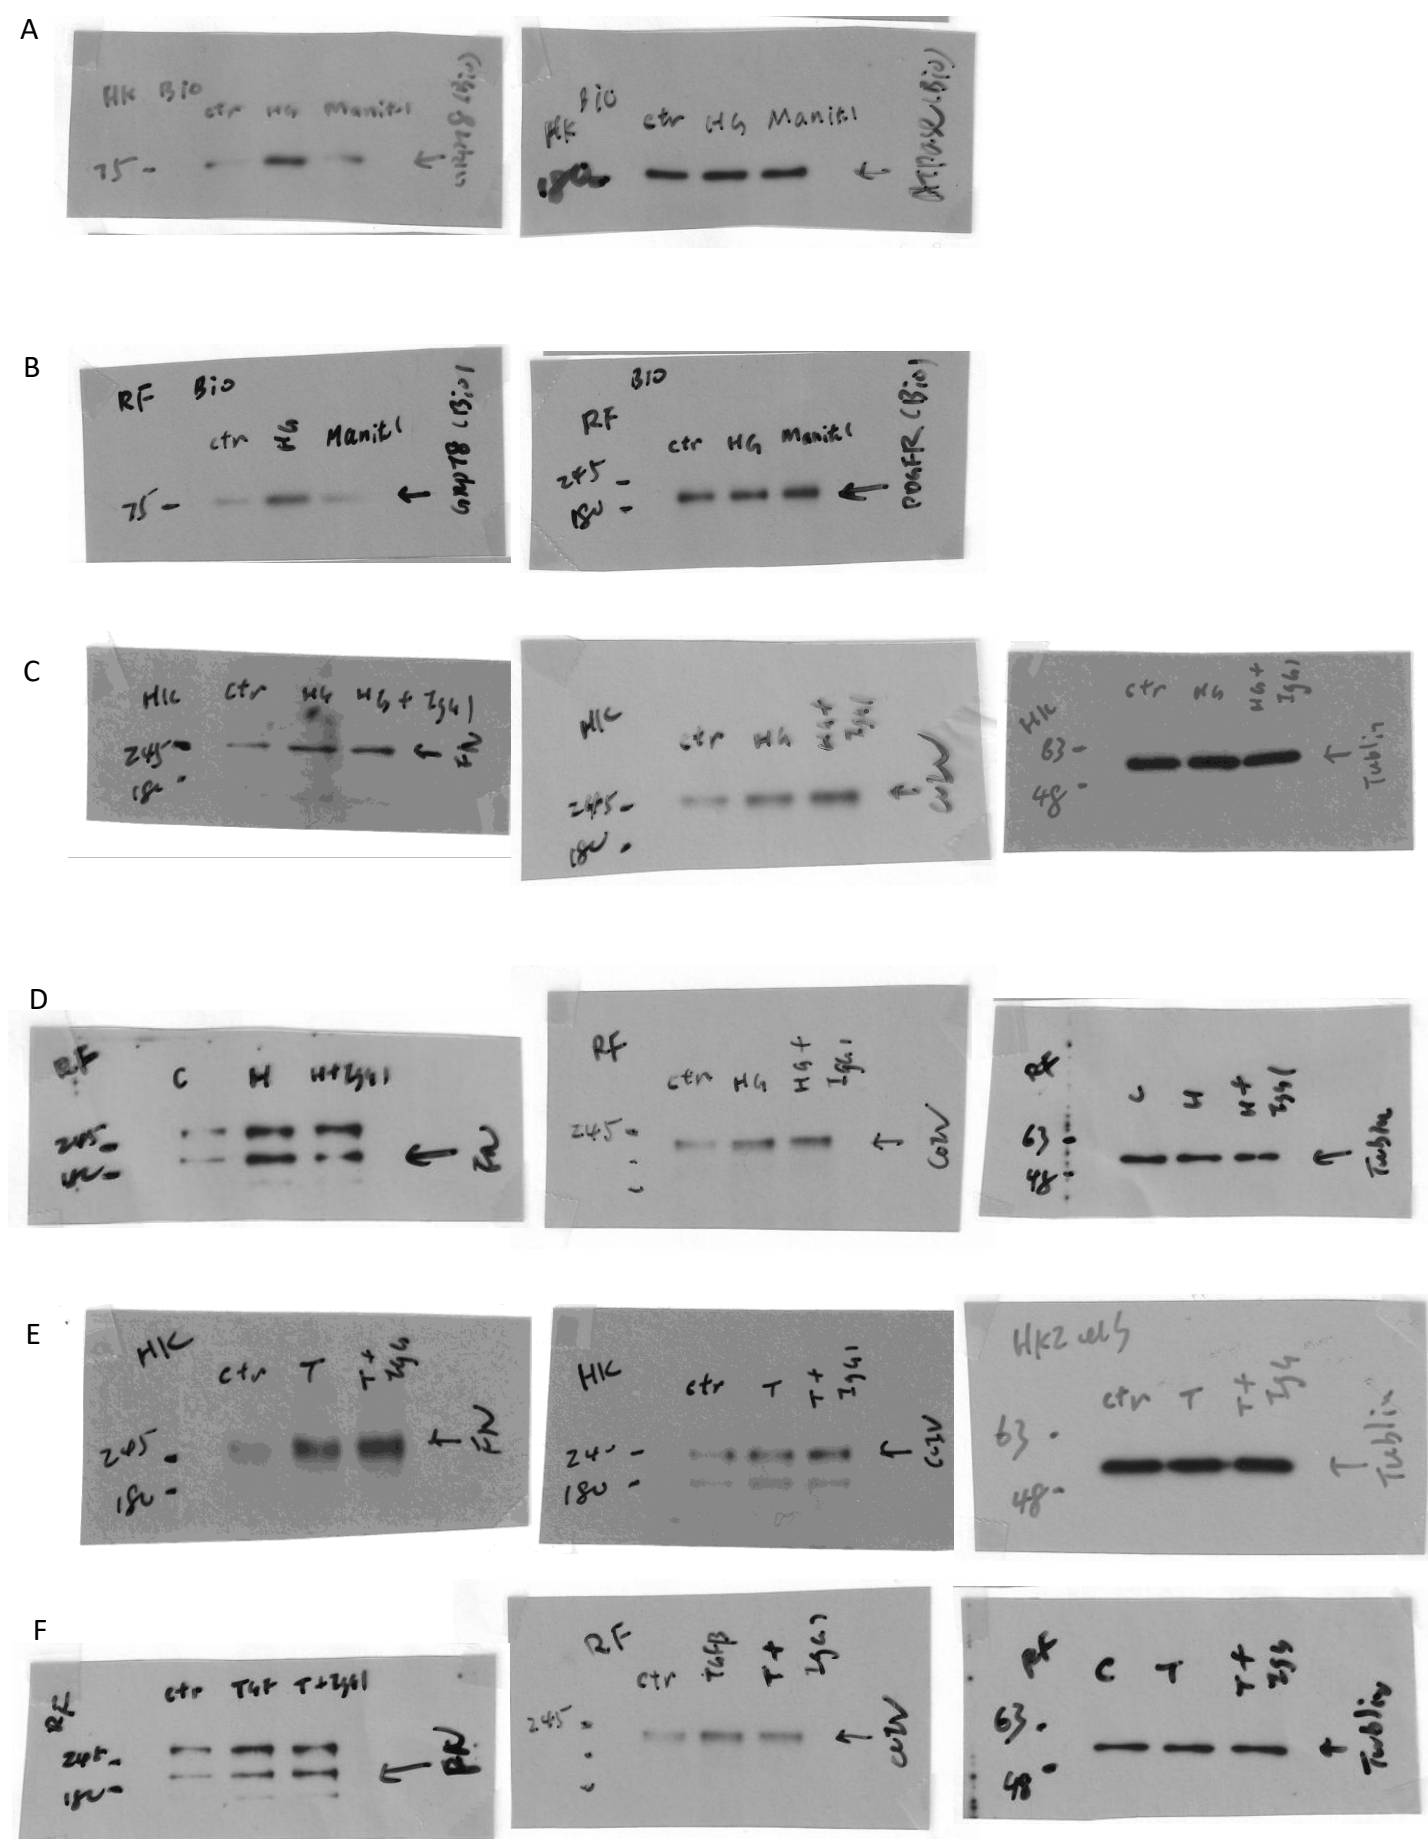

Supplementary Figure 4

A

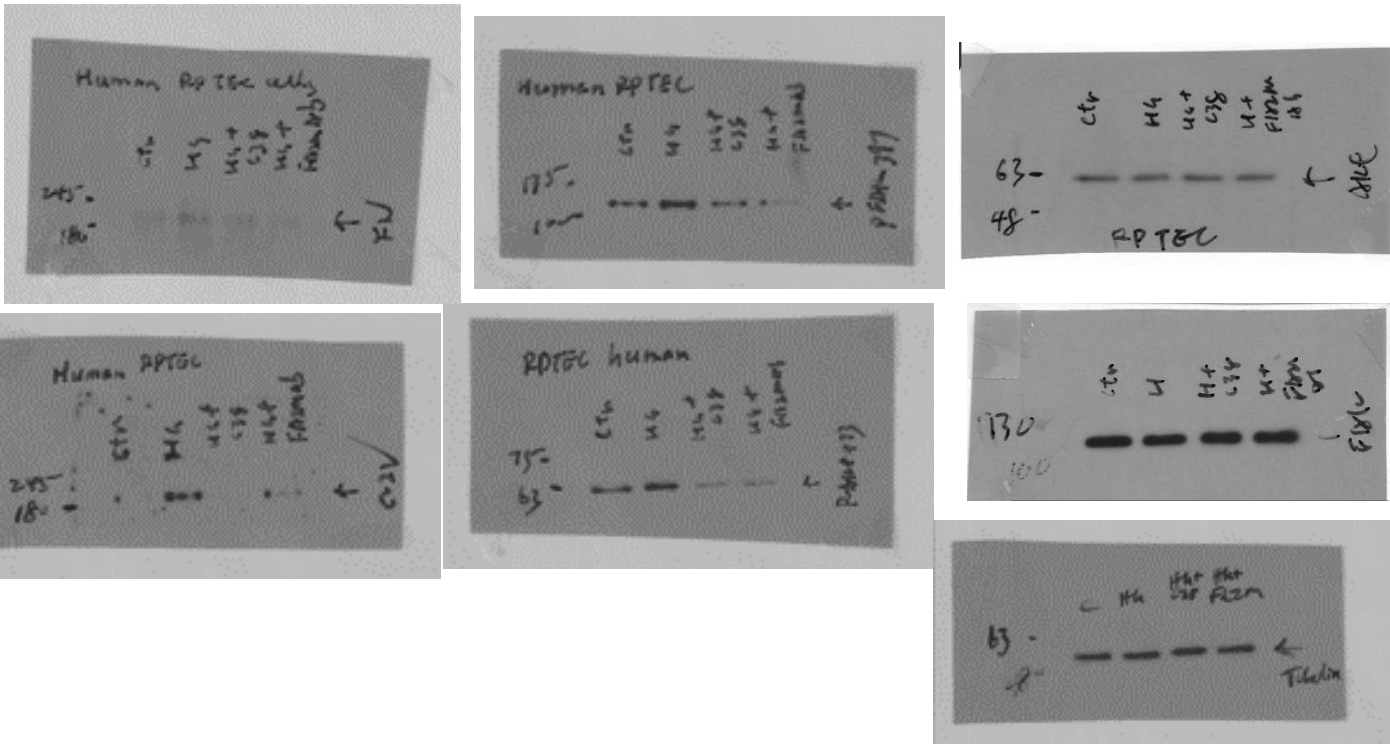

B

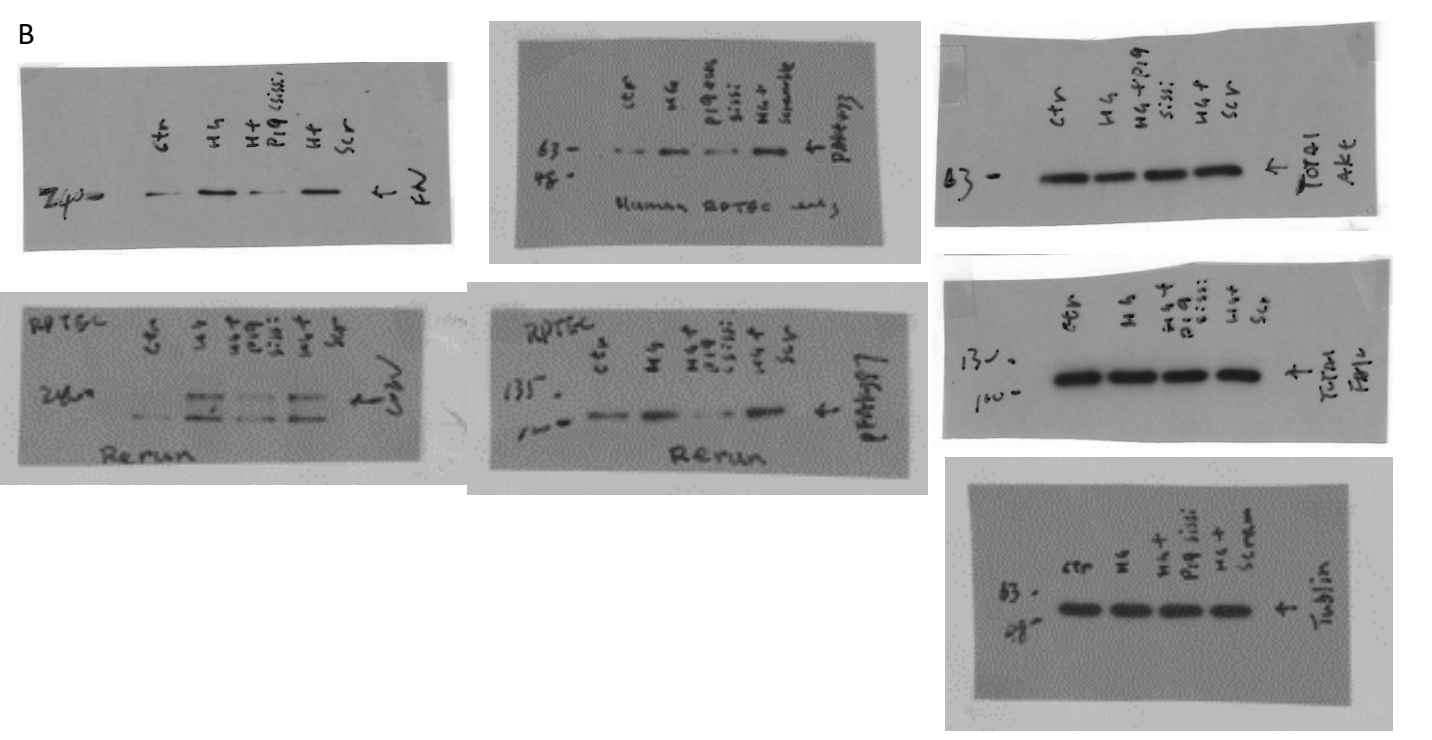

Supplement: sd2 [file 2]
